# Supplementary material for: Synthesis, crystal structure and catalytic activity of the guanidinium cation directed nickel(ii)-containing open Wells–Dawson 19-tungstodiarsenate(iii) [{Ni(H2O)4}2{Na(H2O)}As2W19O67(H2O)]9−
Source: Royal Society of Chemistry journal article supplement (doi:10.1039/c5ra01426c), 2015-01-01
Supplement: c5ra01426c1.pdf [file c5ra01426c1.pdf]

## Supporting information

### **Synthesis, crystal structure and catalytic activity of Guanidinium cation directed Nickel (II)-containing open Wells – Dawson 19-tungstodiarate (III) $[\{\text{Ni}(\text{H}_2\text{O})_4\}_2\{\text{Na}(\text{H}_2\text{O})\}\text{As}_2\text{W}_{19}\text{O}_{67}(\text{H}_2\text{O})]^{9-}$**

#### **Contents-**

**Fig. S1** Hydrogen bonding network along the b-axis between N-H atoms of guanidinium cations and oxygen atoms of the polyanion **1a**.

**Fig. S2** Hydrogen bonding network in one unit of the polyanion **1a** (a) and N-H $\cdots$ O<sub>POM</sub> distances between donor and acceptor atoms (b) in the polyanion **1a**.

**Fig. S3** FT-IR spectrum of **1a** recorded on KBr pellets.

**Fig. S4** Comparison of FT-IR spectra of compound **1a**, and  $\text{K}_{14}[\text{As}_2\text{W}_{19}\text{O}_{67}(\text{H}_2\text{O})]$  recorded on KBr pellets.

**Fig. S5** UV/vis spectrum of **1a**.

**Fig. S6** Thermogram of **1a** from room temperature to 700 °C.

#### **Details of magnetic properties of the polyanion 1a**

#### **Plots of Gas Chromatographic analysis**

#### **Recycling and recovery of the catalyst**

**Table S1** Recyclability of the polyanion **1a** catalyst for oxidation of styrene up to two cycles

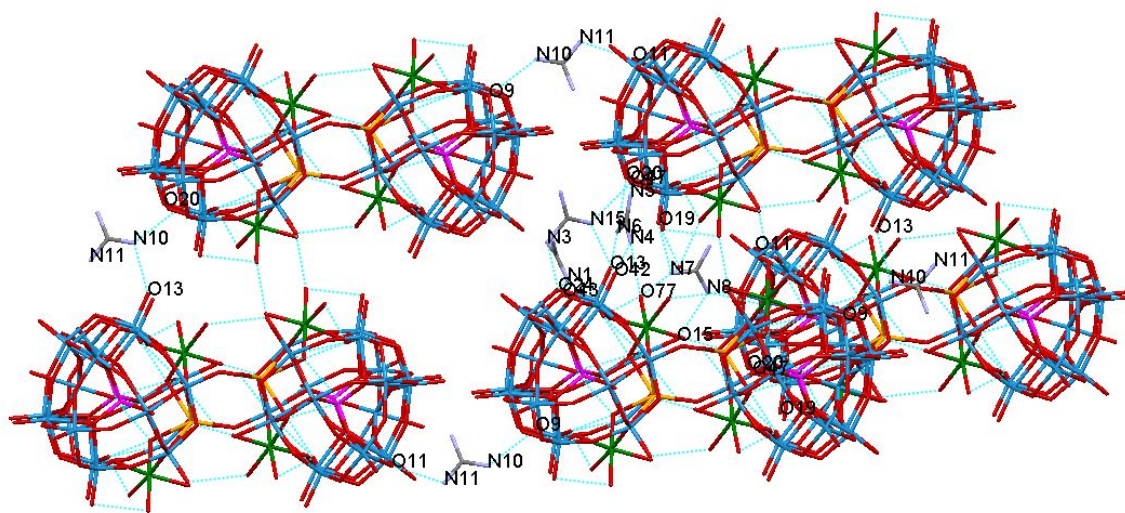

**Fig. S1** Hydrogen bonding network along the b-axis between N-H atoms of guanidinium cations and oxygen atoms of the polyanion **1a**.



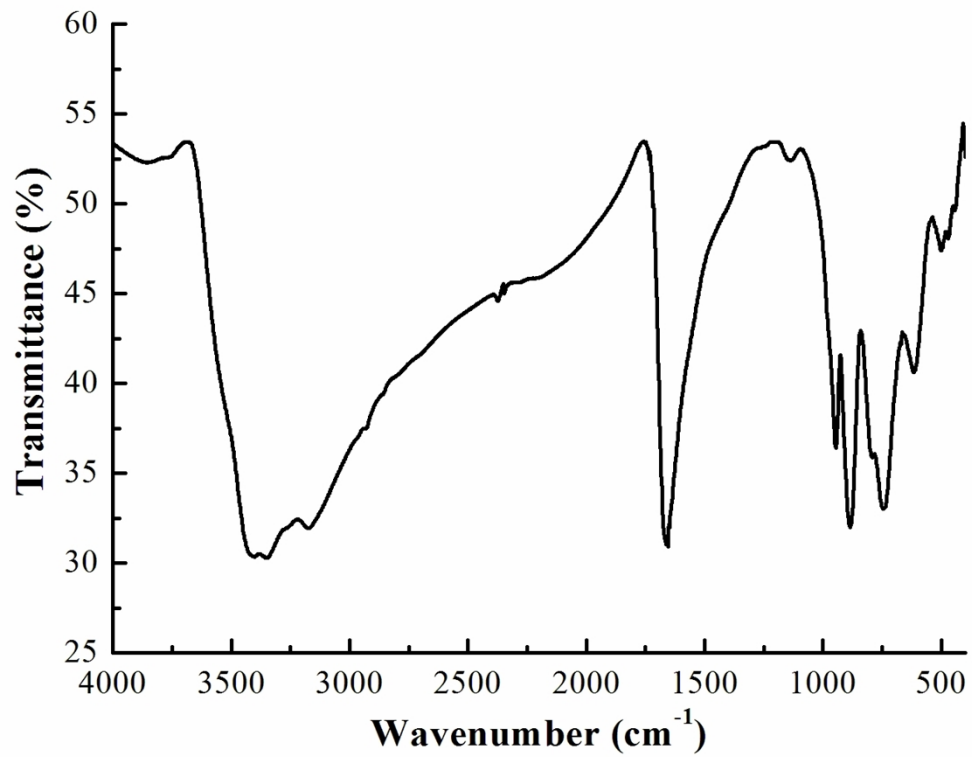

**Fig. S1** FT-IR spectrum of **1a** recorded on KBr pellets.

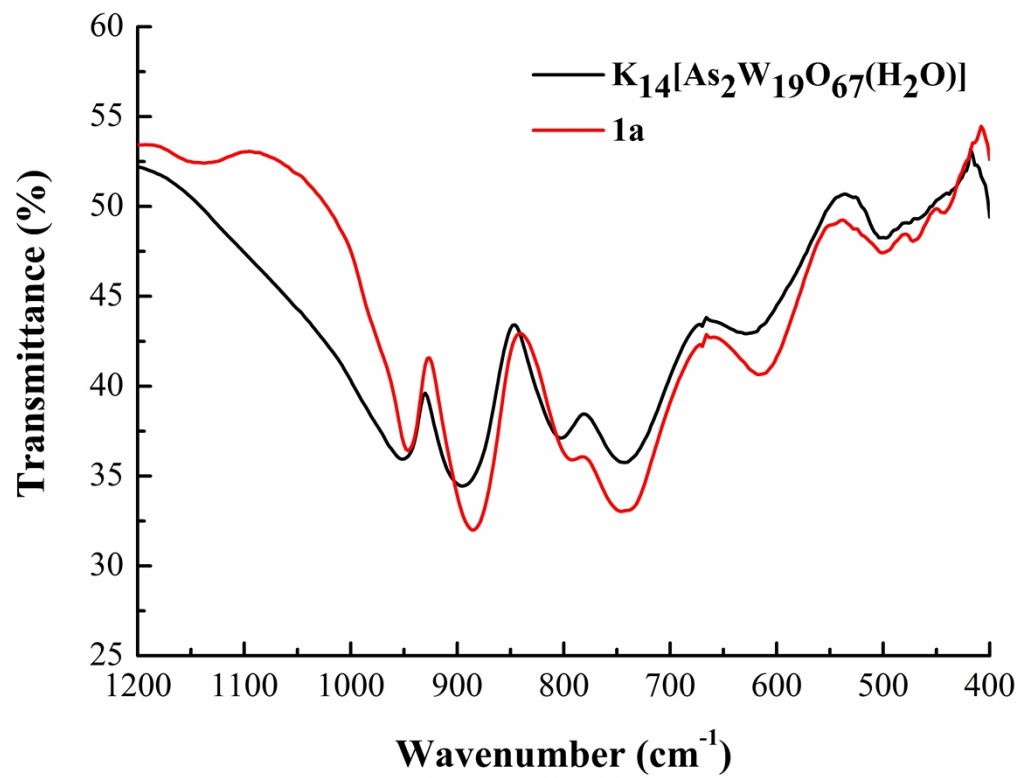

**Fig. S2** Comparison of FT-IR spectra of compound **1a**, and  $K_{14}[As_2W_{19}O_{67}(H_2O)]$  recorded on KBr pellets.

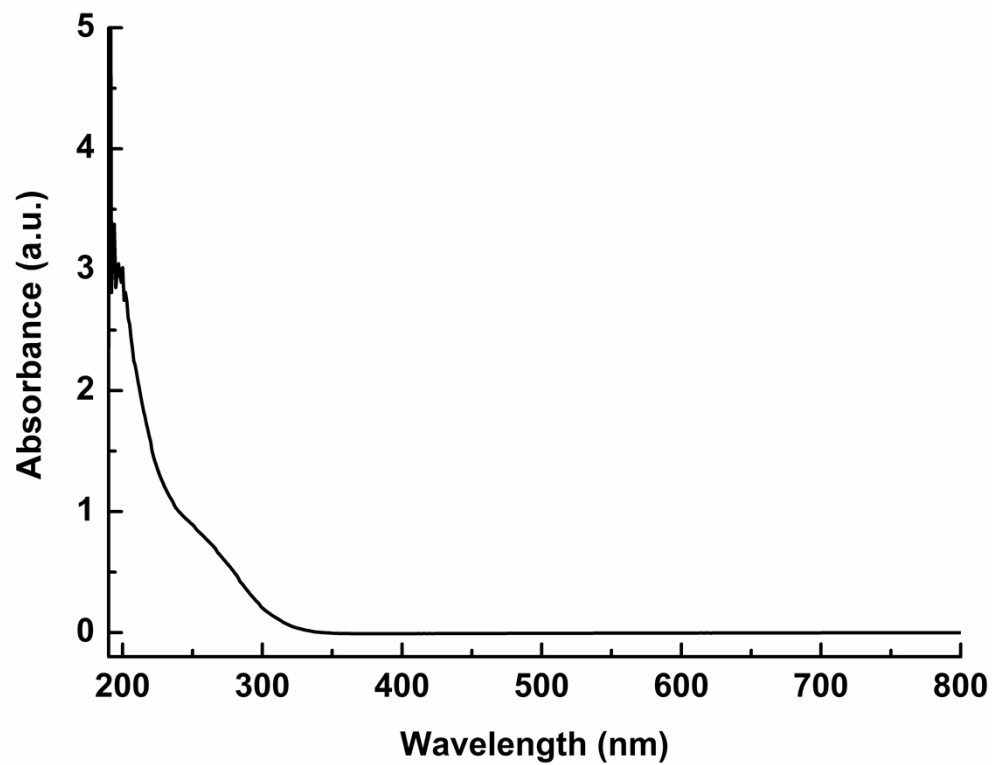

**Fig. S5** UV/vis spectrum of **1a**.

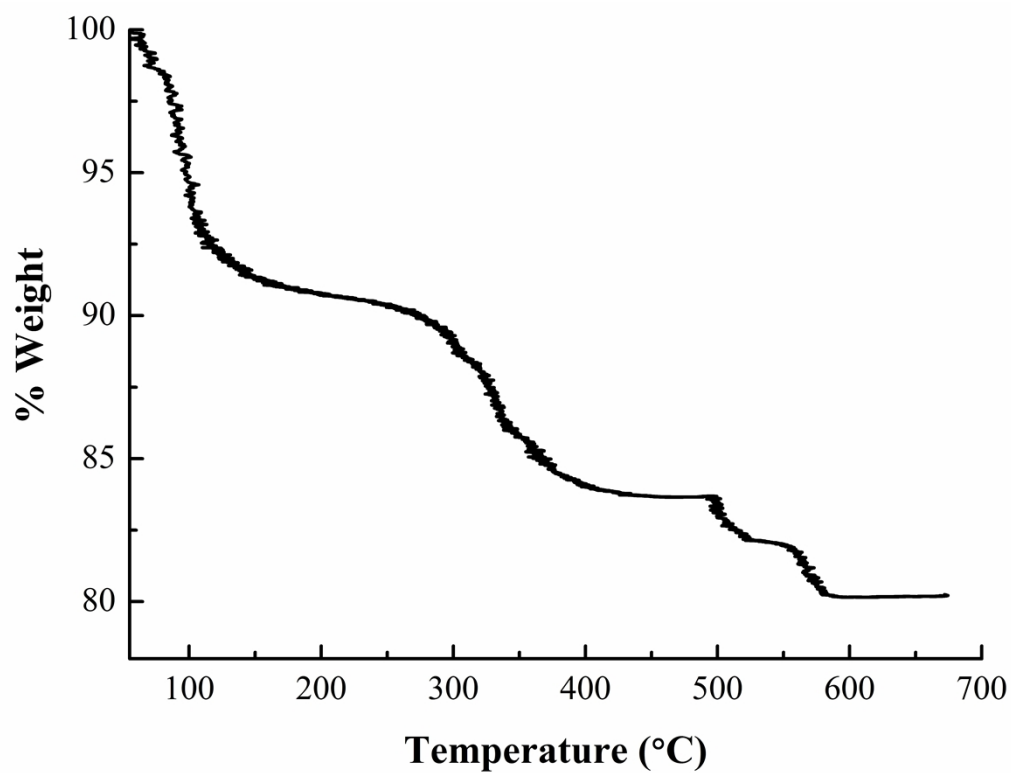

**Fig. S6** Thermogram of **1a** from room temperature to 700 °C.

**Details of magnetic properties of the polyanion 1a**

$$\mu_{\text{eff}} = 2.828(\chi_m T)^{1/2} \dots\dots\dots(\text{Eq.1})$$

Where,  $\chi_m$  is magnetic susceptibility and T = temperature in Kelvin

$$\chi_m = M/H \times \text{Molecular weight of polyanion } \mathbf{1a} \dots\dots\dots(\text{Eq.2})$$

M = 0.00685 and H = 9002 from data and molecular weight of polyanion **1a** is 5823.98 g/mol

$\chi_m = 0.0044$  and T = 294 K substitute these values in (Eq.1)

$$\mu_{\text{eff}} = 3.23 \mu_B$$

### Plots of Gas Chromatographic analysis

Gas chromatogram for standard styrene

GC conditions for standard styrene. Column information Rtx-5, L = 30.0 m, 0.25 mm/ID, injector temperature 220 °C, column flow rate 1.00 ml/min, column temperature 90 – 160 °C, hold time 10 min, temperature program 3 °C/min, detector temperature 250 °C.

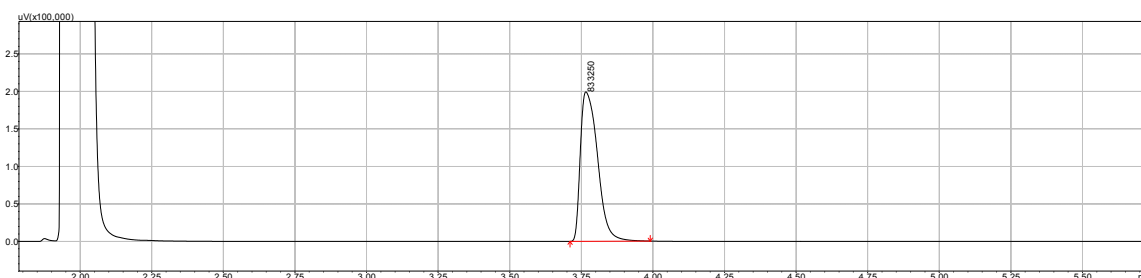

| Peak# | Ret. time | Area     | Height   | Conc.     | Area%    | Compound name |
|-------|-----------|----------|----------|-----------|----------|---------------|
| 1     | 3.766     | 833250.3 | 197971.7 | 100.00000 | 100.0000 | Styrene       |

Gas chromatogram for standard Benzaldehyde

GC conditions are same as standard styrene.



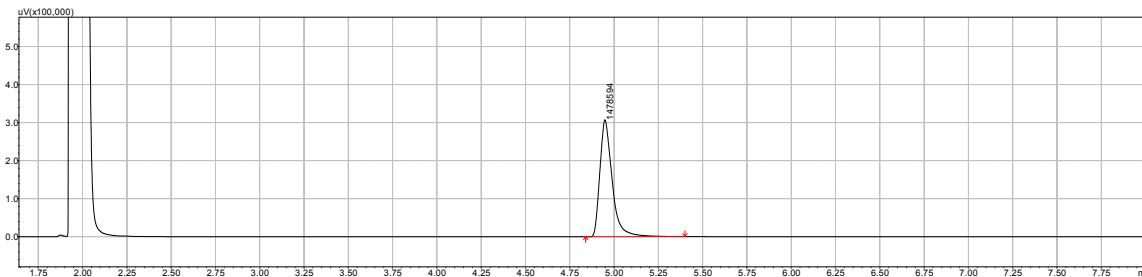

| Peak# | Ret. time | Area      | Height   | Conc.     | Area%    | Compound name |
|-------|-----------|-----------|----------|-----------|----------|---------------|
| 1     | 4.949     | 1478594.3 | 306318.8 | 100.00000 | 100.0000 | Benzaldehyde  |

Gas chromatogram for standard Phenyl acetaldehyde

GC conditions are same as standard styrene.

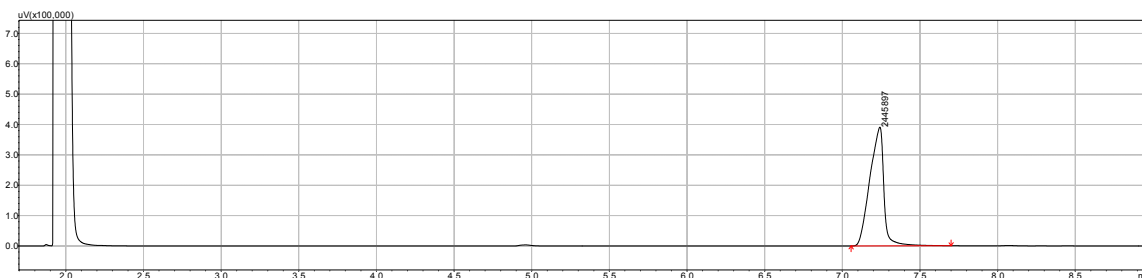

| Peak# | Ret. time | Area      | Height   | Conc.     | Area%    | Compound name       |
|-------|-----------|-----------|----------|-----------|----------|---------------------|
| 1     | 7.241     | 2445897.3 | 387386.2 | 100.00000 | 100.0000 | Phenyl acetaldehyde |

Gas chromatogram for standard Acetophenone

GC conditions are same as standard styrene.

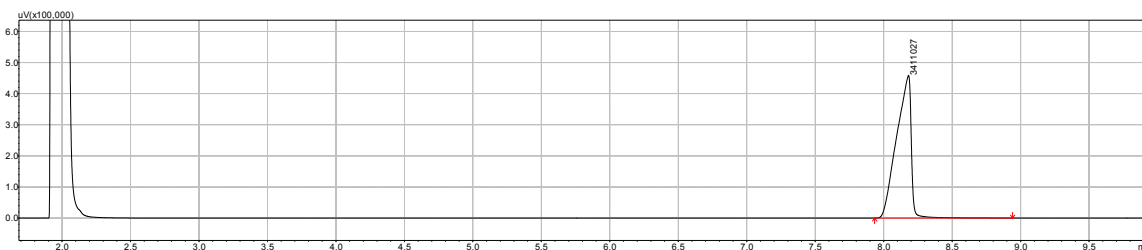

| Peak# | Ret. time | Area      | Height   | Conc.     | Area%    | Compound name |
|-------|-----------|-----------|----------|-----------|----------|---------------|
| 1     | 8.181     | 3411026.9 | 457024.0 | 100.00000 | 100.0000 | Acetophenone  |

Gas chromatogram for standard Benzoic acid

GC conditions are same as standard styrene.

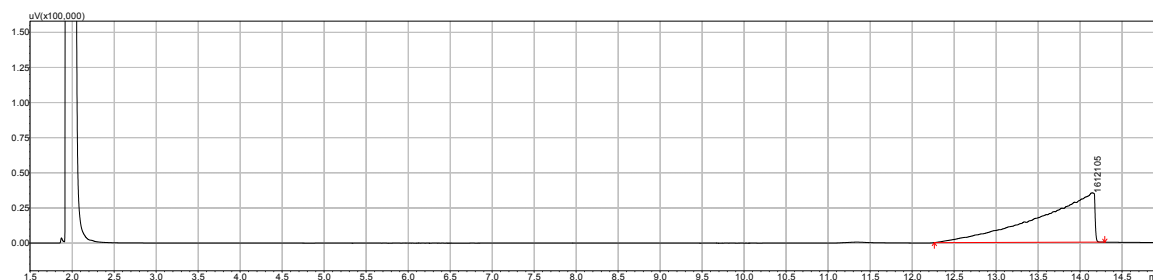

| Peak# | Ret. time | Area      | Height  | Conc.     | Area%    | Compound name |
|-------|-----------|-----------|---------|-----------|----------|---------------|
| 1     | 14.150    | 1612105.3 | 35075.4 | 100.00000 | 100.0000 | Benzoic acid  |

Gas chromatogram for standard 1-phenylethane-1, 2-diol

GC conditions are same as standard styrene.

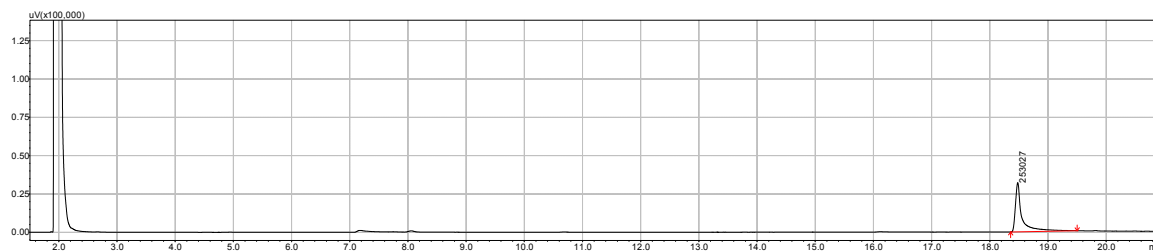

| Peak# | Ret. time | Area     | Height  | Conc.     | Area%    | Compound name            |
|-------|-----------|----------|---------|-----------|----------|--------------------------|
| 1     | 18.480    | 253026.5 | 32026.6 | 100.00000 | 100.0000 | 1-phenylethane-1, 2-diol |

**Gas chromatogram for styrene oxidation reactions**

GC plot for the reaction at 60 °C temperature and 4:1 ( $\text{H}_2\text{O}_2$ /substrate) ratio for 6h

GC conditions are same as standard styrene.

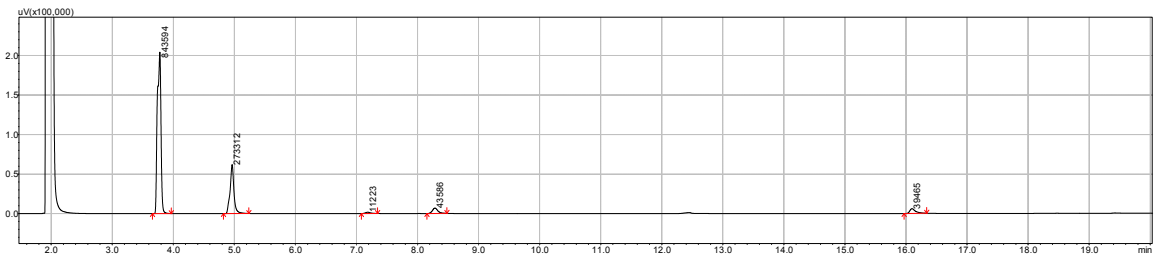

| Peak# | Ret. time | Area     | Height   | Conc.    | Area%   | Compound name              |
|-------|-----------|----------|----------|----------|---------|----------------------------|
| 1     | 3.779     | 843593.8 | 199801.2 | 69.65059 | 69.6506 | Styrene                    |
| 2     | 4.963     | 273311.7 | 61916.7  | 22.56574 | 22.5657 | Benzaldehyde               |
| 3     | 7.185     | 11223.2  | 1816.4   | 0.92663  | 0.9266  | Phenylacetaldehyde         |
| 4     | 8.286     | 43585.7  | 6892.8   | 3.59862  | 3.5986  | Acetophenone               |
| 5     | 16.100    | 39465.4  | 5923.2   | 3.25843  | 3.2584  | 2-hydroxy-1-phenylethanone |

GC plot for the reaction at 70 °C temperature and 4:1 (H<sub>2</sub>O<sub>2</sub>/substrate) ratio for 6h GC conditions are same as standard styrene.

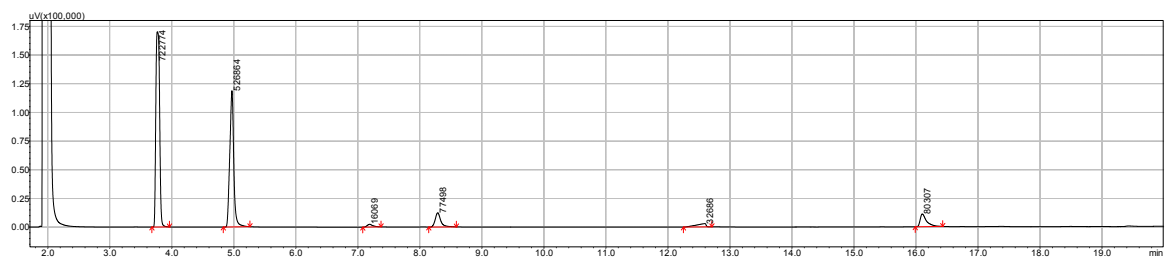

| Peak# | Ret. time | Area     | Height   | Conc.    | Area%   | Compound name              |
|-------|-----------|----------|----------|----------|---------|----------------------------|
| 1     | 3.767     | 722773.9 | 169953.4 | 49.63433 | 49.6343 | Styrene                    |
| 2     | 4.970     | 526864.3 | 117415.3 | 36.18083 | 36.1808 | Benzaldehyde               |
| 3     | 7.191     | 16068.8  | 2484.5   | 1.10348  | 1.1035  | Phenylacetaldehyde         |
| 4     | 8.289     | 77497.5  | 12445.6  | 5.32191  | 5.3219  | Acetophenone               |
| 5     | 12.597    | 32686.1  | 2950.0   | 2.24462  | 2.2446  | Benzoic acid               |
| 6     | 16.102    | 80306.6  | 11181.9  | 5.51482  | 5.5148  | 2-hydroxy-1-phenylethanone |

GC plot for the reaction at 80 °C temperature and 4:1 (H<sub>2</sub>O<sub>2</sub>/substrate) ratio for 6h

GC conditions are same as standard styrene.

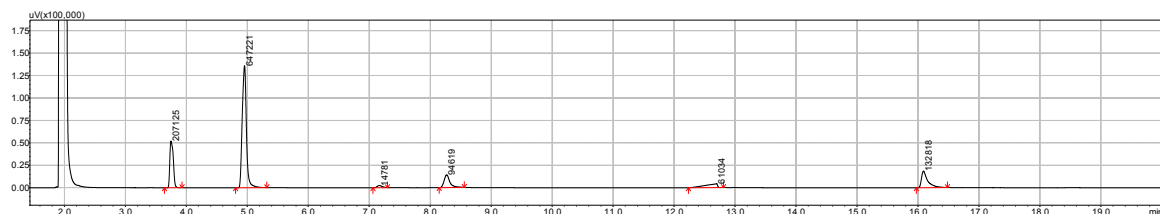

| Peak# | Ret. time | Area     | Height   | Conc.    | Area%   | Compound name              |
|-------|-----------|----------|----------|----------|---------|----------------------------|
| 1     | 3.749     | 207124.8 | 51938.2  | 17.89264 | 17.8926 | Styrene                    |
| 2     | 4.955     | 647220.9 | 135031.2 | 55.91069 | 55.9107 | Benzaldehyde               |
| 3     | 7.167     | 14780.7  | 2498.0   | 1.27684  | 1.2768  | Phenylacetaldehyde         |
| 4     | 8.270     | 94619.4  | 14268.9  | 8.17377  | 8.1738  | Acetophenone               |
| 5     | 12.698    | 61033.5  | 4271.0   | 5.27243  | 5.2724  | Benzoic acid               |
| 6     | 16.090    | 132818.5 | 18650.5  | 11.47363 | 11.4736 | 2-hydroxy-1-phenylethanone |

GC plot for the reaction at 80 °C temperature and 2:1 (H<sub>2</sub>O<sub>2</sub>/substrate) ratio for 6h

GC conditions are same as standard styrene.

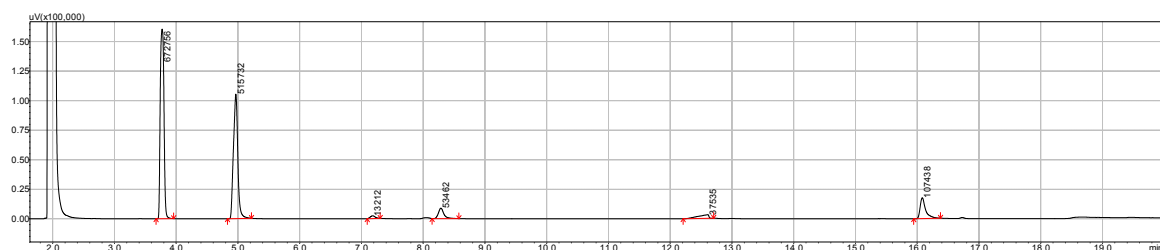

| Peak# | Ret. time | Area     | Height   | Conc.    | Area%   | Compound name              |
|-------|-----------|----------|----------|----------|---------|----------------------------|
| 1     | 3.772     | 672755.5 | 160315.9 | 48.04940 | 48.0494 | Styrene                    |
| 2     | 4.966     | 515731.8 | 104842.1 | 36.83448 | 36.8345 | Benzaldehyde               |
| 3     | 7.182     | 13212.0  | 2355.8   | 0.94363  | 0.9436  | Phenylacetaldehyde         |
| 4     | 8.285     | 53461.6  | 8790.3   | 3.81832  | 3.8183  | Acetophenone               |
| 5     | 12.610    | 37534.7  | 3048.0   | 2.68079  | 2.6808  | Benzoic acid               |
| 6     | 16.083    | 107437.6 | 17553.0  | 7.67338  | 7.6734  | 2-hydroxy-1-phenylethanone |

GC plot for the reaction at 80 °C temperature and 3:1 (H<sub>2</sub>O<sub>2</sub>/substrate) ratio for 6h

GC conditions are same as standard styrene.

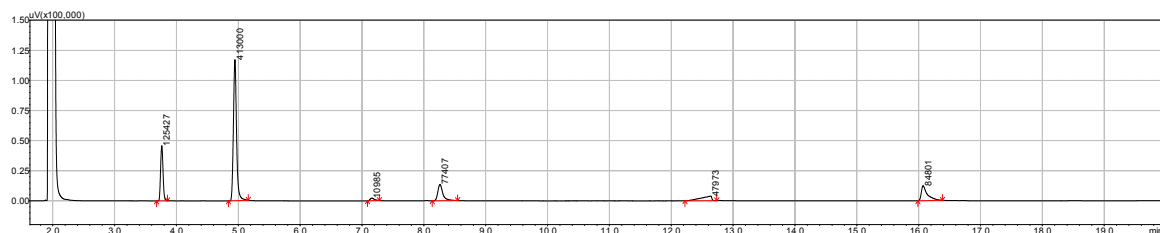

| Peak# | Ret. time | Area     | Height   | Conc.    | Area%   | Compound name              |
|-------|-----------|----------|----------|----------|---------|----------------------------|
| 1     | 3.763     | 125427.4 | 45634.0  | 16.51245 | 16.5124 | Styrene                    |
| 2     | 4.945     | 413000.1 | 117100.3 | 54.37125 | 54.3712 | Benzaldehyde               |
| 3     | 7.160     | 10985.2  | 2275.7   | 1.44619  | 1.4462  | Phenylacetaldehyde         |
| 4     | 8.261     | 77406.6  | 13629.4  | 10.19053 | 10.1905 | Acetophenone               |
| 5     | 12.639    | 47972.9  | 3830.4   | 6.31560  | 6.3156  | Benzoic acid               |
| 6     | 16.072    | 84800.8  | 12458.4  | 11.16398 | 11.1640 | 2-hydroxy-1-phenylethanone |

GC plot for the reaction at 80 °C temperature and 3:1 (H<sub>2</sub>O<sub>2</sub>/substrate) ratio for 3h

GC conditions are same as standard styrene.

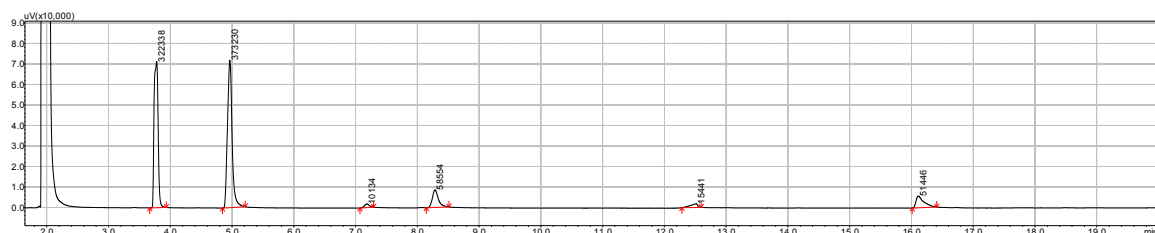

| Peak# | Ret. time | Area     | Height  | Conc.    | Area%   | Compound name              |
|-------|-----------|----------|---------|----------|---------|----------------------------|
| 1     | 3.779     | 322337.7 | 70716.5 | 38.78247 | 38.7825 | Styrene                    |
| 2     | 4.964     | 373230.2 | 71914.1 | 44.90566 | 44.9057 | Benzaldehyde               |
| 3     | 7.183     | 10133.6  | 1822.5  | 1.21924  | 1.2192  | Phenylacetaldehyde         |
| 4     | 8.286     | 58554.2  | 8688.2  | 7.04502  | 7.0450  | Acetophenone               |
| 5     | 12.517    | 15440.8  | 1866.3  | 1.85778  | 1.8578  | Benzoic acid               |
| 6     | 16.112    | 51446.4  | 5776.6  | 6.18984  | 6.1898  | 2-hydroxy-1-phenylethanone |

GC plot for the reaction at 80 °C temperature and 3:1 (H<sub>2</sub>O<sub>2</sub>/substrate) ratio for 9h

GC conditions are same as standard styrene.

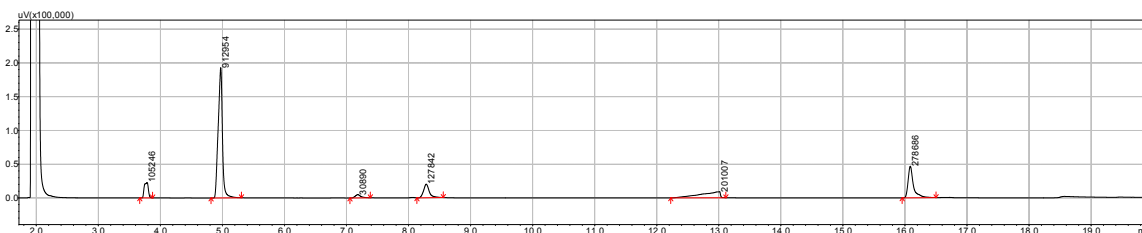

| Peak# | Ret. time | Area     | Height   | Conc.    | Area%   | Compound name              |
|-------|-----------|----------|----------|----------|---------|----------------------------|
| 1     | 3.786     | 105246.3 | 22909.0  | 6.35305  | 6.3531  | Styrene                    |
| 2     | 4.973     | 912954.3 | 192707.2 | 55.10927 | 55.1093 | Benzaldehyde               |
| 3     | 7.182     | 30890.2  | 4933.5   | 1.86465  | 1.8646  | Phenylacetaldehyde         |
| 4     | 8.285     | 127841.9 | 20093.6  | 7.71701  | 7.7170  | Acetophenone               |
| 5     | 13.012    | 201006.7 | 8954.6   | 12.13350 | 12.1335 | Benzoic acid               |
| 6     | 16.086    | 278686.3 | 46645.8  | 16.82253 | 16.8225 | 2-hydroxy-1-phenylethanone |

GC plot for the reaction at 80 °C temperature and 3:1 (H<sub>2</sub>O<sub>2</sub>/substrate) ratio for 9h, catalyst used Ni-POM reported by Mialane et al.

GC conditions are same as standard styrene.

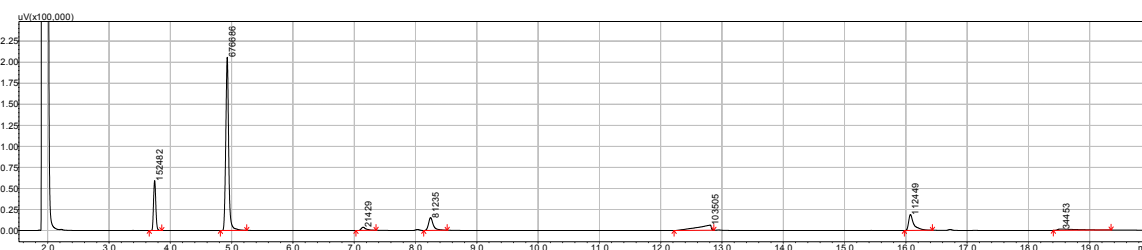

| Peak# | Ret. time | Area     | Height   | Conc.    | Area%   | Compound name              |
|-------|-----------|----------|----------|----------|---------|----------------------------|
| 1     | 3.744     | 152482.1 | 58961.2  | 12.89775 | 12.8977 | Styrene                    |
| 2     | 4.928     | 676686.5 | 202783.7 | 57.23773 | 57.2377 | Benzaldehyde               |
| 3     | 7.146     | 21429.0  | 3843.2   | 1.81258  | 1.8126  | Phenylacetaldehyde         |
| 4     | 8.246     | 81234.5  | 15126.4  | 6.87125  | 6.8712  | Acetophenone               |
| 5     | 12.809    | 103504.7 | 6140.0   | 8.75497  | 8.7550  | Benzoic acid               |
| 6     | 16.074    | 112448.8 | 18966.6  | 9.51151  | 9.5115  | 2-hydroxy-1-phenylethanone |

|   |        |         |        |         |        |                         |
|---|--------|---------|--------|---------|--------|-------------------------|
| 7 | 18.538 | 34453.0 | 1552.1 | 2.91421 | 2.9142 | 1-Phenylethane-1,2-diol |
|---|--------|---------|--------|---------|--------|-------------------------|

GC plot for the reaction at 80 °C temperature and 3:1 (H<sub>2</sub>O<sub>2</sub>/substrate) ratio for 6h, K<sub>14</sub>[As<sub>2</sub>W<sub>19</sub>O<sub>67</sub>(H<sub>2</sub>O)] used as catalyst

GC conditions are same as standard styrene.

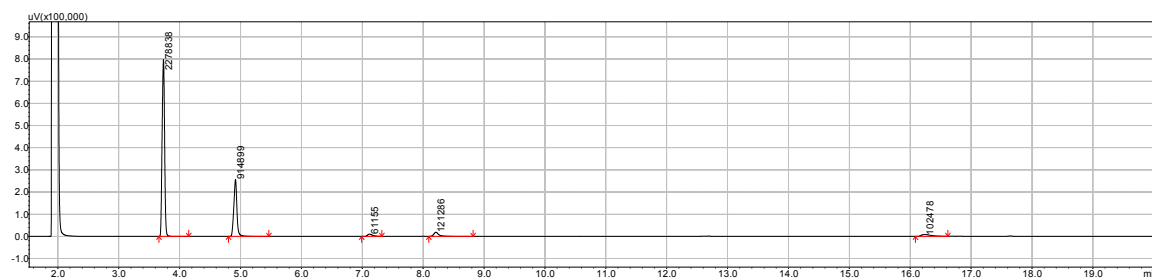

| Peak# | Ret. time | Area      | Height   | Conc.    | Area%   | Compound name              |
|-------|-----------|-----------|----------|----------|---------|----------------------------|
| 1     | 3.734     | 2278837.9 | 789122.6 | 65.50915 | 65.5092 | Styrene                    |
| 2     | 4.917     | 914898.8  | 256250.8 | 26.30035 | 26.3004 | Benzaldehyde               |
| 3     | 7.118     | 61155.4   | 10714.2  | 1.75802  | 1.7580  | Phenylacetaldehyde         |
| 4     | 8.208     | 121286.1  | 19108.7  | 3.48658  | 3.4866  | Acetophenone               |
| 5     | 16.242    | 102477.6  | 8432.0   | 2.94590  | 2.9459  | 2-hydroxy-1-phenylethanone |

GC plot for the reaction at 80 °C temperature and 3:1 (H<sub>2</sub>O<sub>2</sub>/substrate) ratio for 6h, NiCl<sub>2</sub>·6H<sub>2</sub>O used as catalyst

GC conditions are same as standard styrene.

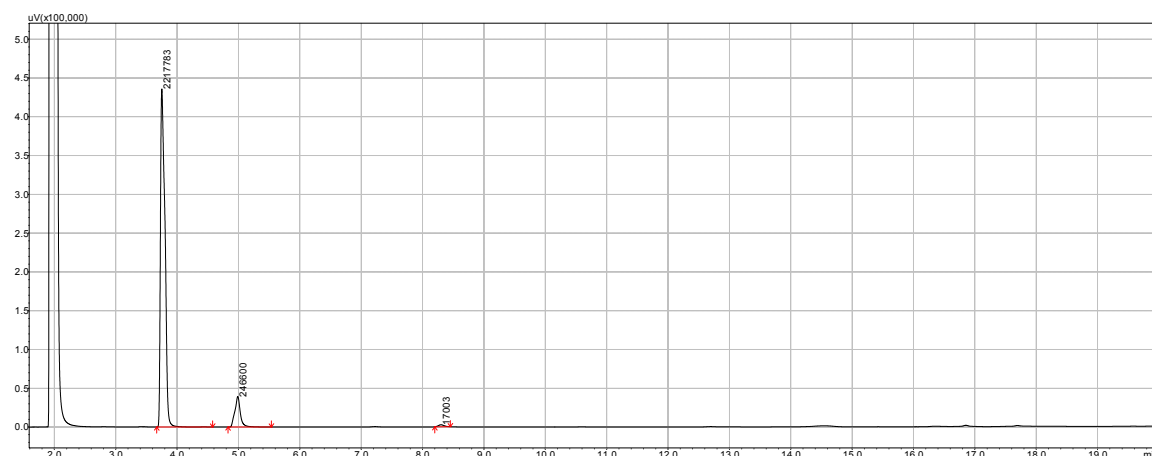

| Peak# | Ret. time | Area | Height | Conc. | Area% | Compound name |
|-------|-----------|------|--------|-------|-------|---------------|
|-------|-----------|------|--------|-------|-------|---------------|

|   |       |           |          |          |         |              |
|---|-------|-----------|----------|----------|---------|--------------|
| 1 | 3.751 | 2217782.9 | 435323.2 | 89.37678 | 89.3768 | Styrene      |
| 2 | 4.989 | 246600.1  | 39339.2  | 9.93800  | 9.9380  | Benzaldehyde |
| 3 | 8.302 | 17003.0   | 2521.5   | 0.68522  | 0.6852  | Acetophenone |

GC plot for the reaction at 80 °C temperature and 3:1 (H<sub>2</sub>O<sub>2</sub>/substrate) ratio for 6h, NiCl<sub>2</sub>·6H<sub>2</sub>O and K<sub>14</sub>[As<sub>2</sub>W<sub>19</sub>O<sub>67</sub>(H<sub>2</sub>O)] both used as catalyst in same reaction

GC conditions are same as standard styrene.

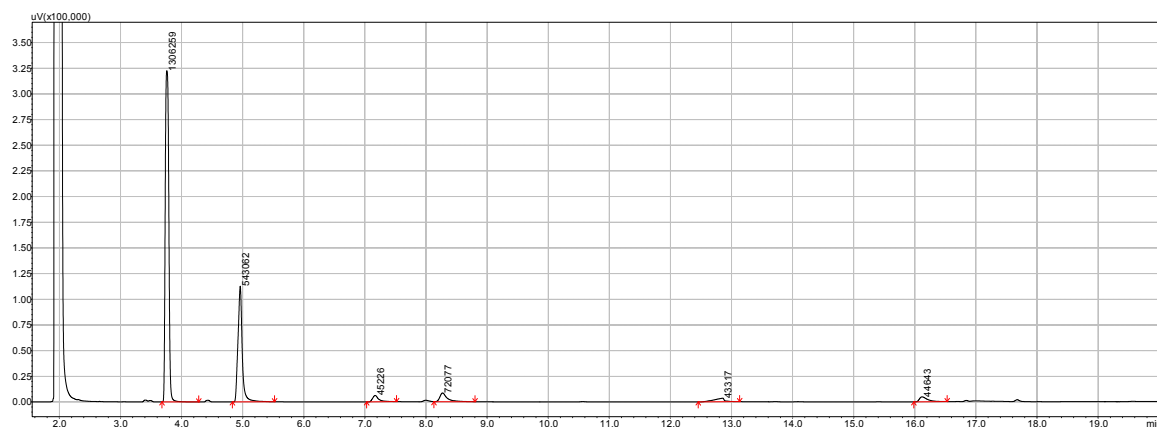

| Peak# | Ret. time | Area      | Height   | Conc.    | Area%   | Compound name              |
|-------|-----------|-----------|----------|----------|---------|----------------------------|
| 1     | 3.759     | 1306258.8 | 322319.1 | 63.57780 | 63.5778 | Styrene                    |
| 2     | 4.960     | 543062.2  | 112627.3 | 26.43174 | 26.4317 | Benzaldehyde               |
| 3     | 7.169     | 45225.9   | 6216.2   | 2.20122  | 2.2012  | Phenylacetaldehyde         |
| 4     | 8.271     | 72076.8   | 8528.0   | 3.50810  | 3.5081  | Acetophenone               |
| 5     | 12.856    | 43316.7   | 3547.2   | 2.10829  | 2.1083  | Benzoic acid               |
| 6     | 16.120    | 44643.0   | 4799.7   | 2.17285  | 2.1728  | 2-hydroxy-1-phenylethanone |

GC plot for the reaction at 80 °C temperature and 4:1 (H<sub>2</sub>O<sub>2</sub>/substrate) ratio for 6h

GC conditions are same as standard styrene.



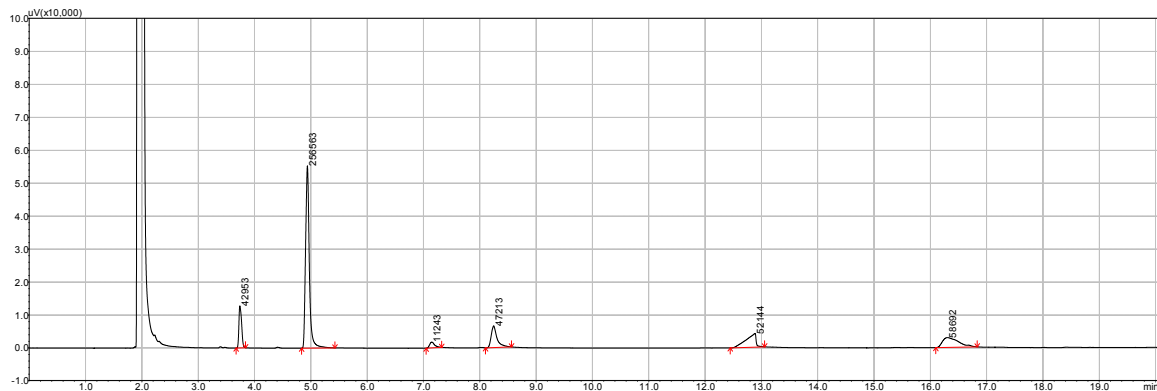

| Peak# | Ret. time | Area     | Height  | Conc.    | Area%   | Compound name              |
|-------|-----------|----------|---------|----------|---------|----------------------------|
| 1     | 3.740     | 42952.6  | 12755.9 | 9.16208  | 9.1621  | Styrene                    |
| 2     | 4.939     | 256563.2 | 55160.2 | 54.72669 | 54.7267 | Benzaldehyde               |
| 3     | 7.146     | 11242.9  | 1788.9  | 2.39820  | 2.3982  | Phenylacetaldehyde         |
| 4     | 8.246     | 47213.0  | 6558.2  | 10.07086 | 10.0709 | Acetophenone               |
| 5     | 12.888    | 52144.1  | 4134.4  | 11.12270 | 11.1227 | Benzoic acid               |
| 6     | 16.304    | 58692.3  | 2979.1  | 12.51947 | 12.5195 | 2-hydroxy-1-phenylethanone |

### Recycling and recovery of the catalyst

After completion of the catalytic reaction, acetonitrile solvent was removed by the evaporation followed by addition of ethyl acetate to the reaction mixture. Organic products were separated in ethyl acetate and the catalyst was precipitated out as solid. The solid recovered catalyst was collected and washed with ethanol and dried at ambient temperature. The dried recovered catalyst was reused for the next catalytic cycle.

**Table S1** Recycling of the polyanion **1a** catalyst for the styrene oxidation reaction up to two cycles <sup>a</sup>

| Sr. No. | Catalytic cycle | H <sub>2</sub> O <sub>2</sub> /sub | Temp. (°C) | Time (h) | Conversion (%) <sup>b</sup> | Selectivity for different products (%) |    |    |    |    |    |
|---------|-----------------|------------------------------------|------------|----------|-----------------------------|----------------------------------------|----|----|----|----|----|
|         |                 |                                    |            |          |                             | 1a                                     | 1b | 1c | 1d | 1e | 1f |
| 01      | 1 <sup>st</sup> | 3 : 1                              | 80         | 6        | 57                          | 66                                     | 4  | 8  | 7  | 15 | -  |
| 02      | 2 <sup>nd</sup> | 3 : 1                              | 80         | 6        | 44                          | 68                                     | 4  | 13 | 4  | 11 | -  |

<sup>a</sup>Reaction conditions: 2 mmol (styrene), 0.15 mol% **1a** catalyst, in 2 mL CH<sub>3</sub>CN stirred for specified temperature and time. <sup>b</sup>Conversion was determined by GC.
